# Supplementary material for: AgNPs Argovit™ Modulates Cyclophosphamide-Induced Genotoxicity on Peripheral Blood Erythrocytes In Vivo
Source: MDPI journal article supplement (doi:10.3390/nano11082096), 2021-08-18
Supplement: s1 [file s1]

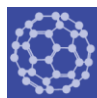

## Supplementary Material

# AgNPs Argovit™ Modulates Cyclophosphamide-Induced Genotoxicity on Peripheral Blood Erythrocytes In Vivo

Idalia Yazmin Castañeda-Yslas <sup>1</sup>, Olivia Torres-Bugarín <sup>2</sup>, Juan Carlos García-Ramos <sup>3,\*</sup>, Yanis Toledano-Magaña <sup>3</sup>, Patricia Radilla-Chávez <sup>3</sup>, Nina Bogdanchikova <sup>4</sup>, Alexey Pestryakov <sup>5</sup>, Balam Ruiz-Ruiz <sup>6</sup> and María Evarista Arellano-García <sup>7,\*</sup>

**Citation:** Castañeda-Yslas, I.Y.;

Torres-Bugarín, O.; García-Ramos, J.C.; Toledano-Magaña, Y.; Radilla-Chávez, P.; Bogdanchikova, N.; Pestryakov, A.; Ruiz-Ruiz, B.; Arellano-García, M.E. AgNPs Argovit™ Modulates Cyclophosphamide-Induced Genotoxicity on Peripheral Blood Erythrocytes In Vivo. *Nanomaterials* **2021**, *11*, x.

<https://doi.org/10.3390/nano11082096>

<sup>1</sup> Programa de Maestría y Doctorado en Ciencias e Ingeniería (MyDCI). Facultad de Ciencias, Universidad Autónoma de Baja California, Ensenada 22860, Baja California, Mexico; idalia.castaneda@uabc.edu.mx

<sup>2</sup> Departamento de Ciclo de vida y Medicina Interna II. Decanato Ciencias de la Salud, Universidad Autónoma de Guadalajara, Zapopan 45129, Jalisco, Mexico; olivatorres@hotmail.com

<sup>3</sup> Escuela de Ciencias de la Salud Unidad Valle Dorado, Universidad Autónoma de Baja California, Ensenada 22890, Baja California, Mexico; yanis.toledano@uabc.edu.mx (Y.T.-M.); patyradilla@uabc.edu.mx (P.R.-C.)

<sup>4</sup> Centro de Nanociencias y Nanotecnología, Universidad Nacional Autónoma de México, Ensenada 22860, Baja California, Mexico; nina@cnyn.unam.mx

<sup>5</sup> Research School of Chemistry and Applied Biomedical Sciences, Tomsk Polytechnic University, 634050 Tomsk, Russia; pestryakov2005@yandex.ru

<sup>6</sup> Departamento de Ciencias de la Salud, Unidad Regional Los Mochis, Universidad Autónoma de Occidente, Los Mochis 81223, Sinaloa, Mexico; balam.ruiz@uadeo.mx

<sup>7</sup> Facultad de Ciencias, Universidad Autónoma de Baja California, Ensenada 22860, Baja California, Mexico;

\* Correspondence: [juan.carlos.garcia.ramos@uabc.edu.mx](mailto:juan.carlos.garcia.ramos@uabc.edu.mx) (J.C.G.-R.); [evarista.arellano@uabc.edu.mx](mailto:evarista.arellano@uabc.edu.mx) (M.E.A.-G.)

Academic Editor(s): Alexandru Mihai Grumezescu; Oana Gherasim

Received: 9 July 2021

Accepted: 13 August 2021

Published: 18 August 2021

**Publisher's Note:** MDPI stays neutral with regard to jurisdictional claims in published maps and institutional affiliations.

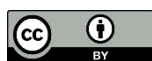

**Copyright:** © 2021 by the authors. Submitted for possible open access publication under the terms and conditions of the Creative Commons Attribution (CC BY) license (<http://creativecommons.org/licenses/by/4.0/>).

Average, SD, and statistical significance of PCE/1,000 TE, MNE/10,000 TE, and MNPCE/1,000 PCE values for the different groups are shown in Tables S1–S3.

**Table S1.** Micronucleated erythrocytes (MN/10,000 TE) in different studied groups.

|       |          | Group 1 |     | Group 2 |     | Group 3 |     | Group 4 |     | Group 5 |     |
|-------|----------|---------|-----|---------|-----|---------|-----|---------|-----|---------|-----|
| Hours | <i>n</i> | Mean    | (±) |
| 0     | 30       | 10.3    | 8.0 | 10.3    | 8.0 | 10.3    | 8.0 | 10.3    | 8.0 | 10.3    | 8.0 |
| 24    | 6        | 19.8    | 6.4 | 9.8     | 2.5 | 39.9    | 5.0 | 3.3     | 1.1 | 21.3    | 4.6 |
| 48    | 6        | 12.9    | 8.4 | 22.9    | 6.3 | 42.1    | 6.6 | 12.7    | 3.4 | 13.7    | 2.3 |
| 72    | 6        | 18.2    | 5.8 | 3.4     | 0.7 | 22.7    | 4.4 | 6.3     | 1.7 | 20.9    | 5.3 |
| 96    | 6        | 16.3    | 6.9 | 14.4    | 7.9 | 21.3    | 2.9 | 2.5     | 1.2 | 23.4    | 2.9 |
| 120   | 6        | 9.6     | 6.3 | 14.3    | 3.1 | 45.5    | 7.7 | 10.3    | 4.4 | 67.7    | 1.4 |
| 144   | 6        | 7.3     | 4.2 | 22.6    | 3.0 | 38.2    | 4.5 | 20.0    | 2.2 | 21.1    | 4.2 |
| 168   | 6        | 15.3    | 4.6 | 14.1    | 2.2 | 27.5    | 3.7 | 1.3     | 1.6 | 21.3    | 2.1 |

*n* = sample size, mean and standard deviation. Polychromatic erythrocytes in 1000 erythrocytes. Group 1: Water (0, 24, and 48 h); Group 2: CP (0 h); Group 3: AgNPs (0, 24, and 48h); Group 4: AgNPs + CP; CP (0 h) + AgNPs (24, 48, and 72 h); Group 5: AgNPs + CP; CP (0, 48, and 96 h) + AgNPs (24, 72, and 120 h).

**Table S2.** Micronucleated Polychromatic Erythrocytes in 1000 Polychromatic Erythrocytes (MNPCE/1000 PCE).

|       |          | Group 1 |     | Group 2 |     | Group 3 |     | Group 4 |     | Group 5 |     |
|-------|----------|---------|-----|---------|-----|---------|-----|---------|-----|---------|-----|
| Hours | <i>n</i> | Mean    | (±) |
| 0     | 30       | 1.6     | 1.8 | 1.6     | 1.8 | 1.6     | 1.8 | 1.6     | 1.8 | 1.6     | 1.8 |
| 24    | 6        | 2.9     | 2.6 | 1.1     | 1.0 | 3.7     | 1.6 | 2.5     | 0.6 | 3.5     | 0.5 |
| 48    | 6        | 4.3     | 3.1 | 19.7    | 6.4 | 3.1     | 0.4 | 5.7     | 1.4 | 10.1    | 3.9 |
| 72    | 6        | 2.5     | 2.1 | 3.4     | 1.7 | 2.2     | 1.0 | 1.2     | 1.7 | 4.2     | 0.9 |
| 96    | 6        | 0.6     | 0.7 | 0.0     | 0.0 | 1.6     | 1.2 | 1.2     | 1.3 | 0.0     | 0.0 |
| 120   | 6        | 0.8     | 0.8 | 0.6     | 0.3 | 4.6     | 2.8 | 1.0     | 1.6 | 41.5    | 6.5 |
| 144   | 6        | 6.0     | 6.0 | 2.9     | 0.8 | 1.9     | 0.6 | 2.9     | 0.4 | 21.7    | 3.1 |
| 168   | 6        | 0.7     | 0.8 | 0.0     | 0.0 | 1.2     | 1.0 | 0.0     | 0.0 | 5.4     | 1.1 |

*n* = sample size, mean and standard deviation. Polychromatic erythrocytes in 1000 erythrocytes. Group 1: Water (0, 24, and 48 h); Group 2: CP (0 h); Group 3: AgNPs (0, 24, and 48h); Group 4: AgNPs + CP; CP (0 h) + AgNPs (24, 48, and 72 h); Group 5: AgNPs + CP; CP (0, 48, and 96 h) + AgNPs (24, 72, and 120 h).

**Table S3.** Polychromatic Erythrocytes in 1000 Total Erythrocytes (PCE/1000 TE).

|       |          | Group 1 |      | Group 2 |      | Group 3 |      | Group 4 |      | Group 5 |      |
|-------|----------|---------|------|---------|------|---------|------|---------|------|---------|------|
| Hours | <i>n</i> | Mean    | (±)  |
| 0     | 30       | 211.0   | 79.0 | 211.0   | 79.0 | 211.0   | 79.0 | 211.0   | 79.0 | 211.0   | 79.0 |
| 24    | 6        | 247.3   | 16.3 | 213.1   | 27.8 | 243.2   | 47.4 | 285.0   | 17.7 | 192.0   | 4.9  |
| 48    | 6        | 248.9   | 60.9 | 174.1   | 21.4 | 225.8   | 12.6 | 254.5   | 67.8 | 138.2   | 12.6 |
| 72    | 6        | 267.2   | 74.2 | 84.2    | 6.1  | 279.8   | 8.2  | 110.4   | 19.4 | 69.4    | 3.7  |
| 96    | 6        | 217.5   | 62.0 | 78.7    | 20.6 | 265.8   | 37.5 | 136.6   | 43.5 | 34.0    | 2.4  |
| 120   | 6        | 270.0   | 71.2 | 194.4   | 5.5  | 166.8   | 21.0 | 213.4   | 21.4 | 48.5    | 7.0  |
| 144   | 6        | 255.2   | 45.8 | 188.5   | 30.8 | 154.3   | 18.3 | 159.5   | 10.4 | 66.3    | 18.2 |
| 168   | 6        | 272.8   | 43.4 | 169.4   | 25.9 | 197.7   | 56.7 | 247.7   | 48.4 | 41.3    | 3.6  |

*n* = sample size, mean and standard deviation. Polychromatic erythrocytes in 1000 erythrocytes. Group 1: Water (0, 24, and 48 h); Group 2: CP (0 h); Group 3: AgNPs (0, 24, and 48h); Group 4: AgNPs + CP; CP (0 h) + AgNPs (24, 48, and 72 h); Group 5: AgNPs + CP; CP (0, 48, and 96 h) + AgNPs (24, 72, and 120 h).
